# Supplementary material for: The Phyloperiodic Approach Removes the “Cryptic Species” and Puts forward Multilevel Organismal Diversity
Source: MDPI journal article supplement (doi:10.3390/d16040220), 2024-04-06
Supplement: s1 [file s1]

**Table S1. PCR amplification options.**

| Name     | 5'→3'                      | Originator                  | Program                                                           |
|----------|----------------------------|-----------------------------|-------------------------------------------------------------------|
| LCO 1490 | GGTCAACAAATCATAAAGATATTGG  | Folmer <i>et al.</i> , 1994 | 95° C 60 s, 35× (95° C 15 s, 45° C 15 s, 72° C 30s), 72° C 7 min  |
| HCO 2198 | TAAACTTCAGGGTGACCAAAAAATCA | Folmer <i>et al.</i> , 1994 |                                                                   |
| 16S arL  | CGCCTGTTTAACAAAAACAT       | Palumbi <i>et al.</i> 2002  | 95° C 3 min, 40× (94° C 15 s, 52° C 15 s, 72° C 30s), 72° C 7 min |
| 16S R    | CCGRTYTGAAGTCAGCTCACG      | Puslednik & Serb, 2008      |                                                                   |
| 28S C1   | ACCCGCTGAATTTAAGCAT        | Dayrat et al. 2001          | 95° C 3 min, 40× (94° C 15 s, 50° C 15 s, 72° C 30s), 72° C 7 min |
| 28S C2   | TGAACTCTCTCTTCAAAGTTCTTTTC | Lê et al, 1993              |                                                                   |

**Table S2. GenBank accession numbers and references for all sequences used in this study.**

| Species name                                                                                                                           | Voucher          | Locality                 | COI             | 16S             | 28S             |
|----------------------------------------------------------------------------------------------------------------------------------------|------------------|--------------------------|-----------------|-----------------|-----------------|
| <i>Aldisa sanguinea</i> (J. G. Cooper, 1863)                                                                                           | CASIZ:182031     | USA: California          | MF958435        | MF958309        | MF958394        |
| <i>Aldisa smaragdina</i> Ortea, Pérez & Llera, 1982                                                                                    | NHMUK20030797    | Canary Islands           | KF992175        | KJ022806        | KJ023043        |
| <i>Cadlina bellburnellae</i> sp. nov.                                                                                                  | ZMMU:Op-870      | Kuril isl., Iturup       | <b>PP554331</b> | <b>PP555223</b> | <b>PP555211</b> |
| <i>Cadlina bellburnellae</i> sp. nov.                                                                                                  | ZMMU:Op-871      | Kuril isl., Iturup       | <b>PP554332</b> | <b>PP555225</b> | <b>PP555212</b> |
| <i>Cadlina bellburnellae</i> sp. nov.                                                                                                  | ZMMU:Op-872      | Kuril isl., Iturup       | <b>PP554333</b> | <b>PP555224</b> | <b>PP555213</b> |
| <i>Cadlina flavomaculata</i> MacFarland, 1905                                                                                          | AM C203860       | USA: California          | EF534041        | EF535109        | -               |
| <i>Cadlina flavomaculata</i> MacFarland, 1905                                                                                          | CASIZ:182923     | USA: California          | EU982715        | EU982764        | -               |
| <i>Cadlina franklinae</i> sp. nov.                                                                                                     | ZMMU:Op-844      | Kuril isl., Urup         | <b>PP554311</b> | <b>PP555216</b> | <b>PP555196</b> |
| <i>Cadlina franklinae</i> sp. nov.                                                                                                     | ZMMU:Op-845      | Kuril isl., Urup         | <b>PP554316</b> | <b>PP555222</b> | -               |
| <i>Cadlina franklinae</i> sp. nov.                                                                                                     | ZMMU:Op-846      | Kuril isl., Chirpoy      | <b>PP554315</b> | <b>PP555217</b> | <b>PP555197</b> |
| <i>Cadlina franklinae</i> sp. nov.                                                                                                     | ZMMU:Op-847      | Kuril isl., Urup         | <b>PP554312</b> | <b>PP555218</b> | -               |
| <i>Cadlina franklinae</i> sp. nov.                                                                                                     | ZMMU:Op-848      | Kuril isl., Urup         | <b>PP554317</b> | <b>PP555219</b> | <b>PP555198</b> |
| <i>Cadlina franklinae</i> sp. nov.                                                                                                     | ZMMU:Op-849      | Kuril isl. Urup          | <b>PP554313</b> | <b>PP555220</b> | -               |
| <i>Cadlina franklinae</i> sp. nov.                                                                                                     | ZMMU:Op-856      | Kuril isl., Urup         | <b>PP554318</b> | <b>PP555221</b> | <b>PP555199</b> |
| <i>Cadlina franklinae</i> sp. nov.                                                                                                     | ZMMU:Op-857      | Kuril isl., Urup         | <b>PP554314</b> | -               | <b>PP555200</b> |
| <i>Cadlina jannanicholsae</i> Korshunova, Fletcher, Picton, Lundin, Kashio, N. Sanamyan, K. Sanamyan, Padula, Schrödl & Martynov, 2020 | ZMMU:Op-689      | USA: Washington          | MN224063        | MN224091        | MN224125        |
| <i>Cadlina jannanicholsae</i> Korshunova, Fletcher, Picton, Lundin, Kashio, N. Sanamyan, K. Sanamyan, Padula, Schrödl & Martynov, 2020 | CASIZ:188599A    | Canada: British Columbia | KM219678        | KJ653679        | KP340350        |
| <i>Cadlina jannanicholsae</i> Korshunova, Fletcher, Picton, Lundin, Kashio, N. Sanamyan, K. Sanamyan, Padula, Schrödl & Martynov, 2020 | -                | Canada: British Columbia | AF249803        | AF249231        | -               |
| <i>Cadlina japonica</i> Baba, 1937                                                                                                     | KSNHM-M10746     | Japan                    | MN224051        | MN224077        | -               |
| <i>Cadlina japonica</i> Baba, 1937                                                                                                     | KSNHM-M10746     | Japan                    | MN224052        | MN224078        | MN224113        |
| <i>Cadlina japonica</i> Baba, 1937                                                                                                     | NIBRIV0000865973 | South Korea              | MT420432        | MT425045        | MT425037        |
| <i>Cadlina japonica</i> Baba, 1937                                                                                                     | NIBRIV0000865974 | South Korea              | MT420433        | MT425046        | MT425038        |
| <i>Cadlina japonica</i> Baba, 1937                                                                                                     | NIBRIV0000865975 | South Korea              | MT420434        | MT425047        | MT425039        |

|                                                                                                                                      |                  |                          |                 |                 |                 |
|--------------------------------------------------------------------------------------------------------------------------------------|------------------|--------------------------|-----------------|-----------------|-----------------|
| <i>Cadlina kamchatica</i> Korshunova, Picton, Sanamyan & Martynov, 2015                                                              | ZMMU:Op-446      | Russia: Kamchatka        | MN224053        | MN224079        | MN224114        |
| <i>Cadlina kamchatica</i> Korshunova, Picton, Sanamyan & Martynov, 2015                                                              | ZMMU:Op-453      | Russia: Kamchatka        | MN224054        | MN224080        | MN224115        |
| <i>Cadlina kamchatica</i> Korshunova, Picton, Sanamyan & Martynov, 2015                                                              | AC17-28          | Russia: Bering Sea       | KX938361        | KX938357        | -               |
| <i>Cadlina kamchatica</i> Korshunova, Picton, Sanamyan & Martynov, 2015                                                              | AC17-29          | Russia: Bering Sea       | KX938362        | KX938358        | -               |
| <i>Cadlina klasmalmergi</i> Korshunova, Fletcher, Picton, Lundin, Kashio, N. Sanamyan, K. Sanamyan, Padula, Schrödl & Martynov, 2020 | ZMMU:Op-687      | USA: Washington          | MN224065        | MN224093        | MN224127        |
| <i>Cadlina klasmalmergi</i> Korshunova, Fletcher, Picton, Lundin, Kashio, N. Sanamyan, K. Sanamyan, Padula, Schrödl & Martynov, 2020 | ZMMU:Op-688      | Canada: British Columbia | MN224066        | MN224094        | MN224128        |
| <i>Cadlina klasmalmergi</i> Korshunova, Fletcher, Picton, Lundin, Kashio, N. Sanamyan, K. Sanamyan, Padula, Schrödl & Martynov, 2020 | CASIZ:182929     | Canada: British Columbia | EU982719        | EU982769        | -               |
| <i>Cadlina klasmalmergi</i> Korshunova, Fletcher, Picton, Lundin, Kashio, N. Sanamyan, K. Sanamyan, Padula, Schrödl & Martynov, 2020 | CAS:CASIZ        | Canada: British Columbia | EU982720        | -               | -               |
| <i>Cadlina koltzovi</i> sp. nov.                                                                                                     | ZMMU:Op-840      | Kuril isl., Urup         | <b>PP554319</b> | <b>PP555230</b> | <b>PP555190</b> |
| <i>Cadlina koltzovi</i> sp. nov.                                                                                                     | ZMMU:Op-841      | Kuril isl., Urup         | <b>PP554320</b> | <b>PP555231</b> | -               |
| <i>Cadlina koltzovi</i> sp. nov.                                                                                                     | ZMMU:Op-842      | Kuril isl., Urup         | <b>PP554321</b> | <b>PP555232</b> | <b>PP555191</b> |
| <i>Cadlina koltzovi</i> sp. nov.                                                                                                     | ZMMU:Op-843      | Kuril isl., Urup         | <b>PP554322</b> | <b>PP555233</b> | -               |
| <i>Cadlina koltzovi</i> sp. nov.                                                                                                     | ZMMU:Op-852      | Kuril isl., Kunashir     | <b>PP554323</b> | <b>PP555234</b> | <b>PP555192</b> |
| <i>Cadlina koltzovi</i> sp. nov.                                                                                                     | ZMMU:Op-853      | Kuril isl., Iturup       | <b>PP554324</b> | <b>PP555235</b> | <b>PP555193</b> |
| <i>Cadlina koltzovi</i> sp. nov.                                                                                                     | ZMMU:Op-854      | Kuril isl., Iturup       | <b>PP554325</b> | <b>PP555236</b> | <b>PP555194</b> |
| <i>Cadlina koltzovi</i> sp. nov.                                                                                                     | ZMMU:Op-855      | Kuril isl., Iturup       | <b>PP554326</b> | <b>PP555237</b> | <b>PP555195</b> |
| <i>Cadlina koreana</i> Do, Jung, Kil & Kim, 2020                                                                                     | NIBRIV0000865970 | South Korea              | MT420429        | MT425042        | MT425034        |
| <i>Cadlina koreana</i> Do, Jung, Kil & Kim, 2020                                                                                     | NIBRIV0000865971 | South Korea              | MT420430        | MT425043        | MT425035        |
| <i>Cadlina koreana</i> Do, Jung, Kil & Kim, 2020                                                                                     | SMU00060         | South Korea              | MT420431        | MT425044        | MT425036        |
| <i>Cadlina laevis</i> (Linnaeus, 1767)                                                                                               | -                | Scotland                 | AY345034        | AY345034        | -               |
| <i>Cadlina laevis</i> (Linnaeus, 1767)                                                                                               | ZMMU:Op-677      | Russia: White sea        | MN224057        | MN224084        | MN224119        |

|                                                                                                                                 |               |                      |                 |                 |                 |
|---------------------------------------------------------------------------------------------------------------------------------|---------------|----------------------|-----------------|-----------------|-----------------|
| <i>Cadlina laevis</i> (Linnaeus, 1767)                                                                                          | ZMMU:Op-678.1 | Russia: White sea    | MN224047        | MN224085        | MN224120        |
| <i>Cadlina laevis</i> (Linnaeus, 1767)                                                                                          | ZMMU:Op-678.2 | Russia: White sea    | <b>PP554297</b> | <b>PP555214</b> | <b>PP555184</b> |
| <i>Cadlina laevis</i> (Linnaeus, 1767)                                                                                          | ZMMU:Op-679   | Russia: Barents sea  | MN224058        | MN224086        | MN224121        |
| <i>Cadlina laevis</i> (Linnaeus, 1767)                                                                                          | ZMMU:Op-608   | Norway               | MN224049        | MN224081        | MN224116        |
| <i>Cadlina laevis</i> (Linnaeus, 1767)                                                                                          | ZMMU:Op-609   | Norway               | <b>PP554298</b> | <b>PP555215</b> | <b>PP555185</b> |
| <i>Cadlina laevis</i> (Linnaeus, 1767)                                                                                          | ZMMU:Op-680   | Sweden               | MN224059        | MN224087        | MN224122        |
| <i>Cadlina laevis</i> (Linnaeus, 1767)                                                                                          | -             | Sweden               | AJ223258        | AJ225182        | -               |
| <i>Cadlina laevis</i> (Linnaeus, 1767)                                                                                          | ZMMU:Op-675   | Ireland              | MN224055        | MN224082        | MN224117        |
| <i>Cadlina laevis</i> (Linnaeus, 1767)                                                                                          | ZMMU:Op-676   | Ireland              | MN224056        | MN224083        | MN224118        |
| <i>Cadlina lomonosovi</i> sp. nov.                                                                                              | ZMMU:Op-858   | Kuril isl., Iturup   | <b>PP554305</b> | <b>PP555247</b> | <b>PP555205</b> |
| <i>Cadlina lomonosovi</i> sp. nov.                                                                                              | ZMMU:Op-859   | Kuril isl., Iturup   | <b>PP554307</b> | <b>PP555243</b> | <b>PP555206</b> |
| <i>Cadlina lomonosovi</i> sp. nov.                                                                                              | ZMMU:Op-860   | Kuril isl., Iturup   | <b>PP554309</b> | <b>PP555246</b> | <b>PP555208</b> |
| <i>Cadlina lomonosovi</i> sp. nov.                                                                                              | ZMMU:Op-861   | Kuril isl., Iturup   | <b>PP554306</b> | <b>PP555245</b> | -               |
| <i>Cadlina lomonosovi</i> sp. nov.                                                                                              | ZMMU:Op-862   | Kuril isl., Iturup   | <b>PP554308</b> | <b>PP555248</b> | <b>PP555207</b> |
| <i>Cadlina lomonosovi</i> sp. nov.                                                                                              | ZMMU:Op-863   | Kuril isl., Iturup   | <b>PP554304</b> | <b>PP555244</b> | <b>PP555204</b> |
| <i>Cadlina lomonosovi</i> sp. nov.                                                                                              | ZMMU:Op-864   | Kuril isl., Iturup   | <b>PP554310</b> | <b>PP555242</b> | <b>PP555209</b> |
| <i>Cadlina lomonosovi</i> sp. nov.                                                                                              | ZMMU:Op-865   | Kuril isl., Iturup   | <b>PP554300</b> | <b>PP555239</b> | <b>PP555202</b> |
| <i>Cadlina lomonosovi</i> sp. nov.                                                                                              | ZMMU:Op-866   | Kuril isl., Kunashir | <b>PP554299</b> | <b>PP555238</b> | <b>PP555201</b> |
| <i>Cadlina lomonosovi</i> sp. nov.                                                                                              | ZMMU:Op-867   | Kuril isl., Iturup   | <b>PP554302</b> | <b>PP555241</b> | -               |
| <i>Cadlina lomonosovi</i> sp. nov.                                                                                              | ZMMU:Op-868   | Kuril isl., Kunashir | <b>PP554303</b> | -               | <b>PP555210</b> |
| <i>Cadlina lomonosovi</i> sp. nov.                                                                                              | ZMMU:Op-869   | Kuril isl., Kunashir | <b>PP554301</b> | <b>PP555240</b> | <b>PP555203</b> |
| <i>Cadlina luarna</i> (Er. Marcus & Ev. Marcus, 1967)                                                                           | CASIZ         | Costa Rica           | EU982717        | EU982767        | -               |
| <i>Cadlina luarna</i> (Er. Marcus & Ev. Marcus, 1967)                                                                           | CASIZ:175437  | Costa Rica           | EU982718        | EU982768        | -               |
| <i>Cadlina luteomarginata</i> MacFarland, 1966                                                                                  | CASIZ         | USA: California      | EU982721        | EU982771        | -               |
| <i>Cadlina modesta</i> MacFarland, 1966                                                                                         | CASIZ:175444  | USA: California      | MF958437        | MF958310        | -               |
| <i>Cadlina modesta</i> MacFarland, 1966                                                                                         | CASIZ         | USA: California      | EU982722        | EU982772        | -               |
| <i>Cadlina modesta</i> MacFarland, 1966                                                                                         | CASIZ:182930  | USA: California      | EU982723        | EU982773        | -               |
| <i>Cadlina pellucida</i> (Risso, 1826)                                                                                          | CASIZ:175448  | Portugal             | EU982724        | EU982774        | MF958396        |
| <i>Cadlina paninae</i> Korshunova, Fletcher, Picton, Lundin, Kashio, N. Sanamyan, K. Sanamyan, Padula, Schrödl & Martynov, 2020 | ZMMU:Op-683   | Russia: Matua        | MN224060        | MN224088        | -               |
| <i>Cadlina paninae</i> Korshunova, Fletcher, Picton,                                                                            | ZMMU:Op-684   | Russia: Matua        | MN224061        | MN224089        | MN224123        |

|                                                                                                                                       |                  |                      |                 |                 |                 |
|---------------------------------------------------------------------------------------------------------------------------------------|------------------|----------------------|-----------------|-----------------|-----------------|
| Lundin, Kashio, N. Sanamyan, K. Sanamyan, Padula, Schrödl & Martynov, 2020                                                            |                  |                      |                 |                 |                 |
| <i>Cadlina paninae</i> Korshunova, Fletcher, Picton, Lundin, Kashio, N. Sanamyan, K. Sanamyan, Padula, Schrödl & Martynov, 2020       | ZMMU:Op-685      | Russia: Matua        | MN224062        | MN224090        | MN224124        |
| <i>Cadlina rumia</i> Er. Marcus, 1955                                                                                                 | CASIZ:175456     | Panama               | EU982725        | EU982775        | -               |
| <i>Cadlina sparsa</i> (Odhner, 1921)                                                                                                  | CASIZ: 182932    | USA: California      | EU982726        | EU982776        | -               |
| <i>Cadlina sylviaearleae</i> Korshunova, Fletcher, Picton, Lundin, Kashio, N. Sanamyan, K. Sanamyan, Padula, Schrödl & Martynov, 2020 | ZMMU:Op-686      | USA: Washington      | MN224064        | MN224092        | MN224126        |
| <i>Cadlina sylviaearleae</i> Korshunova, Fletcher, Picton, Lundin, Kashio, N. Sanamyan, K. Sanamyan, Padula, Schrödl & Martynov, 2020 | 11BIOAK-0009     | USA: Alaska          | KF643619        | -               | -               |
| <i>Cadlina</i> sp.                                                                                                                    | CASIZ:175547     | South Africa         | EU982727        | EU982777        | -               |
| <i>Cadlina umiushi</i> Korshunova, Picton, Sanamyan & Martynov, 2015                                                                  | ZMMU:Op-445      | Russia: Sea of Japan | MN224067        | MN224095        | MN224129        |
| <i>Cadlina umiushi</i> Korshunova, Picton, Sanamyan & Martynov, 2015                                                                  | ZMMU:Op-455      | Russia: Sea of Japan | MN224068        | MN224096        | MN224130        |
| <i>Cadlina umiushi</i> Korshunova, Picton, Sanamyan & Martynov, 2015                                                                  | AC7-14           | Russia: Sea of Japan | KX610757        | KX938354        | -               |
| <i>Cadlina umiushi</i> Korshunova, Picton, Sanamyan & Martynov, 2015                                                                  | AC16-30          | Russia: Sea of Japan | KX610756        | KX938355        | -               |
| <i>Cadlina umiushi</i> Korshunova, Picton, Sanamyan & Martynov, 2015                                                                  | AC16-31          | Russia: Sea of Japan | KX610758        | KX938356        | -               |
| <i>Cadlina umiushi</i> Korshunova, Picton, Sanamyan & Martynov, 2015                                                                  | NIBRIV0000865972 | South Korea          | MT420435        | MT425048        | MT425040        |
| <i>Cadlina umiushi</i> Korshunova, Picton, Sanamyan & Martynov, 2015                                                                  | SMU00070         | South Korea          | MT420436        | MT425049        | MT425041        |
| <i>Cadlina vavilovi</i> sp. nov.                                                                                                      | MIMB 42230       | Kuril isl., Iturup   | MZ711326        | MZ713213        | MZ713231        |
| <i>Cadlina vinogradovi</i> sp. nov.                                                                                                   | ZMMU:Op-838      | Kuril isl., Urup     | <b>PP554327</b> | <b>PP555226</b> | <b>PP555186</b> |
| <i>Cadlina vinogradovi</i> sp. nov.                                                                                                   | ZMMU:Op-839      | Kuril isl., Urup     | <b>PP554330</b> | <b>PP555227</b> | <b>PP555187</b> |
| <i>Cadlina vinogradovi</i> sp. nov.                                                                                                   | ZMMU:Op-850      | Kuril isl., Iturup   | <b>PP554328</b> | <b>PP555228</b> | <b>PP555188</b> |
| <i>Cadlina vinogradovi</i> sp. nov.                                                                                                   | ZMMU:Op-851      | Kuril isl., Iturup   | <b>PP554329</b> | <b>PP555229</b> | <b>PP555189</b> |
